# Supplementary material for: Anaerobic co-digestion of municipal wastewater sludge with food waste with different fat, oil, and grease contents: study of reactor performance and extracellular polymeric substances
Source: Royal Society of Chemistry journal article supplement (doi:10.1039/c5ra21459a), 2015-01-01
Supplement: c5ra21459a1.pdf [file c5ra21459a1.pdf]

## Supplementary Information

### **Anaerobic co-digestion of municipal wastewater sludge with food waste under different fat, oil, grease contents: study on reactor performance and extracellular polymeric substances**

Rui Xu <sup>a,b</sup>, Zhaohui Yang <sup>a,b,\*</sup>, Ting Chen <sup>a,b</sup>, Lijun Zhao <sup>a,b</sup>, Jing Huang <sup>a,b</sup>, Haiyin Xu <sup>a,b</sup>, Peipei Song <sup>a,b</sup>

<sup>a</sup> College of Environmental Science and Engineering, Hunan University, Changsha 410082, P.R. China

<sup>b</sup> Key Laboratory of Environmental Biology and Pollution Control (Hunan University), Ministry of Education, Changsha 410082, P.R. China

---

\* Corresponding author. Tel.: + 86-731-88822829; Fax: + 86-731-88822829. E-mail address: yzh@hnu.edu.cn (Z.H. Yang).

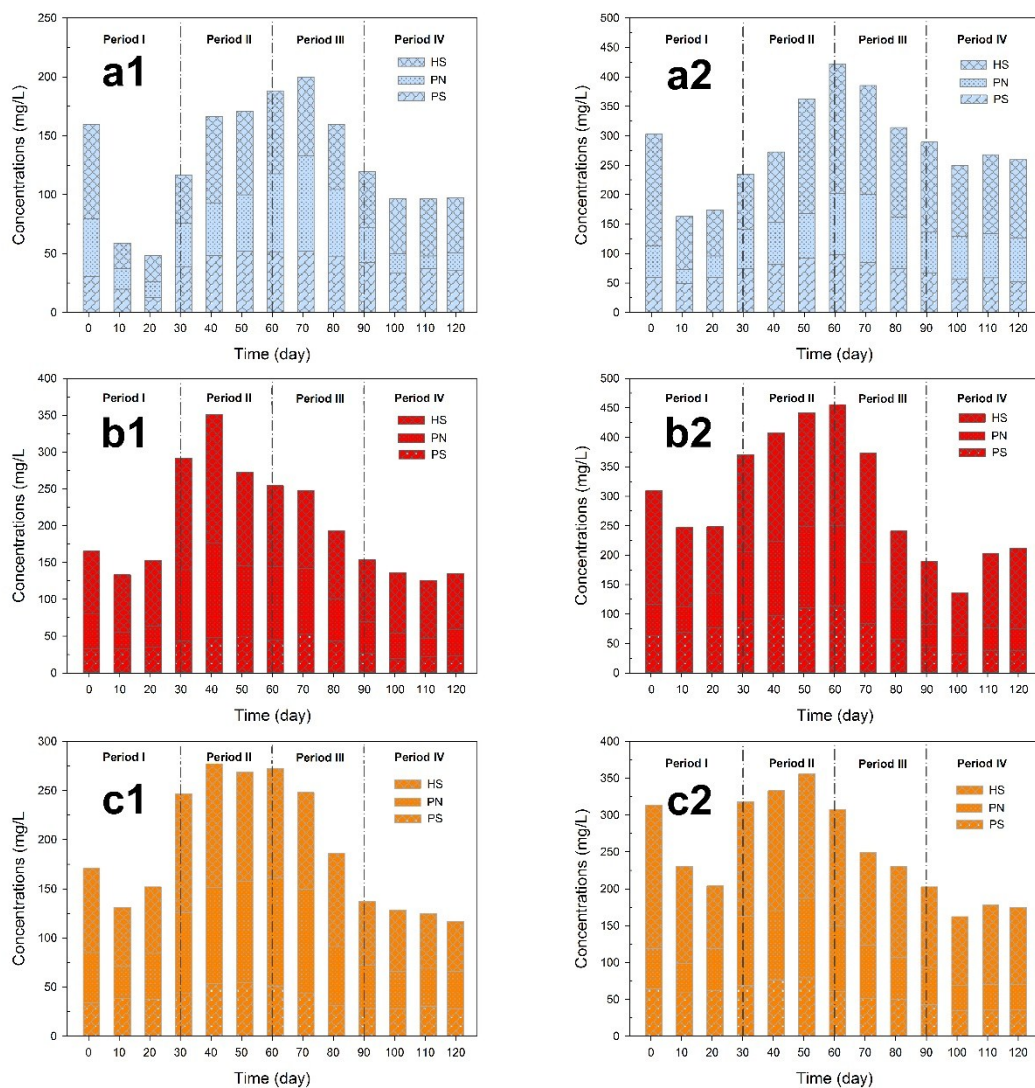

**Fig. S1** EPS subfraction concentrations in three anaerobic co-digestion reactors: (a1) R1 LB-EPS; (a2) R1 TB-EPS; (b1) R2 LB-EPS; (b2) R2 TB-EPS; (c1) R3 LB-EPS; (c2) R3 TB-EPS.

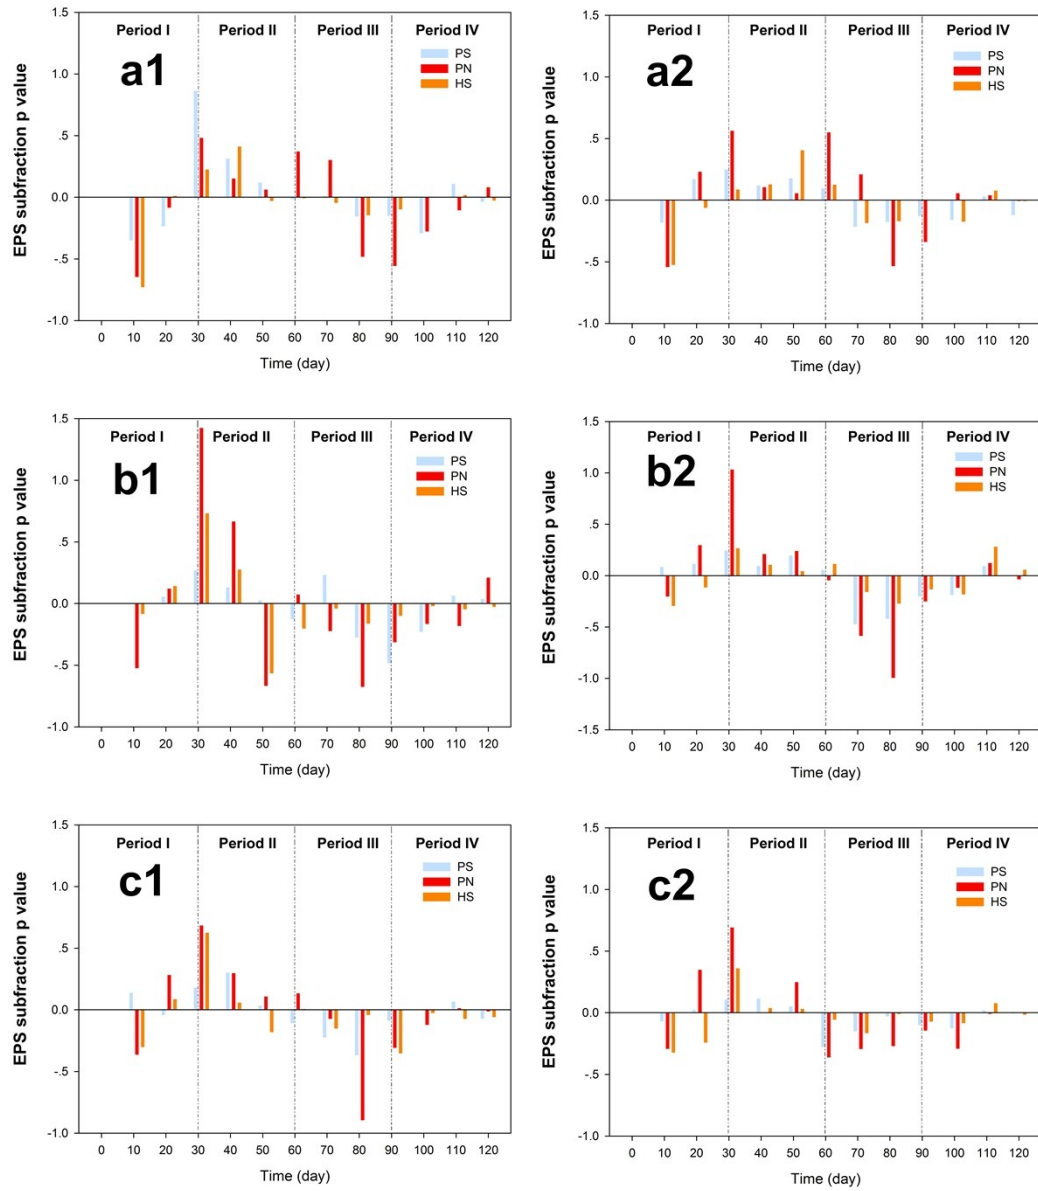

**Fig. S2** EPS subfraction p value in three anaerobic co-digestion reactors: (a1) R1 LB-EPS; (a2) R1 TB-EPS; (b1) R2 LB-EPS; (b2) R2 TB-EPS; (c1) R3 LB-EPS; (c2) R3 TB-EPS.
